# Supplementary material
Source: PubMed Central journal article supplement (PMC2259067)
Supplement: plntphys_pp.107.113647_2.pdf [file plntphys_pp.107.113647_2.pdf]

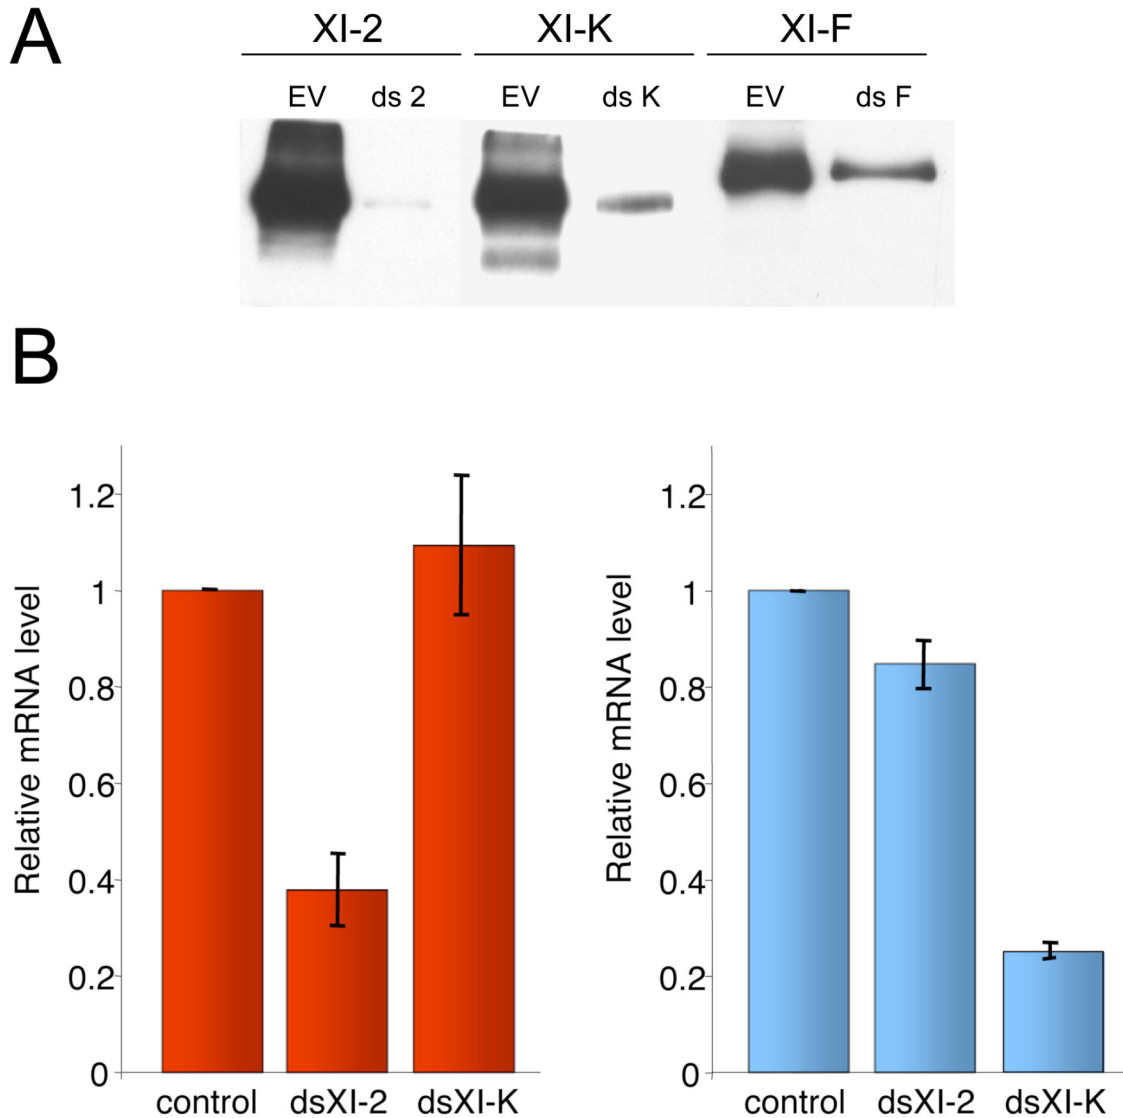

**Figure S2** - RNAi of the myosins in *N. benthamiana*. **(A)** Local RNAi of the ectopically expressed, HA-tagged, tails of the myosins XI-2, XI-K, and XI-F using the inverted repeat constructs (ds 2, ds K, and ds F, respectively). EV, empty vector control. Protein accumulation levels were assayed by immunoblotting using monoclonal, HA-specific antibody. **(B)** Systemic RNAi of the endogenous genes encoding myosins XI-2 and XI-K using the inverted repeat constructs (ds XI-2 and ds XI-K, respectively). Normalized activity of myosin XI-2 (red/left chart) and myosin XI-K (blue/right chart) genes on the y axis was measured by real-time PCR as described in experimental procedures. Bars represent (left to right): control – basal expression of the myosins. dsXI-2 – RNAi of myosin XI-2. dsXI-K – RNAi of myosin XI-K.
