# Supplementary material
Source: PubMed Central journal article supplement (PMC2259067)
Supplement: plntphys_pp.107.113647_3.pdf [file plntphys_pp.107.113647_3.pdf]

**Table 1. Classification of plant myosins \***

| <b>GI or protein ID</b>                                                                                                                            | <b>Gene/locus ID</b> | <b>Chromosome</b> | <b>Class and Group</b> | <b>Domains in addition to motor domain</b> | <b>Comment</b>            |
|----------------------------------------------------------------------------------------------------------------------------------------------------|----------------------|-------------------|------------------------|--------------------------------------------|---------------------------|
| <i>Arabidopsis thaliana</i> <sup>1</sup>                                                                                                           |                      |                   |                        |                                            |                           |
| 15219766                                                                                                                                           | AT1G04600            | 1                 | XI(G)                  | MyoN, IQ,CC, DIL                           | XI-A                      |
| 15221848                                                                                                                                           | AT1G54560            | 1                 | XI(J)                  | MyoN, IQ,CC, DIL                           | XI-E                      |
| 30685403                                                                                                                                           | AT1G17580            | 1                 | XI(K)                  | MyoN, IQ,CC, DIL                           | XI-1 (MYA1)               |
| 42561681                                                                                                                                           | AT1G04160            | 1                 | XI(G)                  | MyoN, IQ,CC, DIL                           | XI-B                      |
| 42561814                                                                                                                                           | AT1G08730            | 1                 | XI(J)                  | MyoN, IQ,CC, DIL                           | XI-C                      |
| 42562644                                                                                                                                           | AT1G50360            | 1                 | VIII(A)                | MyoN, IQ,CC                                | VIII-A                    |
| 42569181                                                                                                                                           | AT2G20290            | 2                 | XI(G)                  | MyoN, IQ,CC, DIL                           | XI-G                      |
| 42569537                                                                                                                                           | AT2G31900            | 2                 | XI(F)                  | MyoN, IQ,CC, DIL                           | XI-F                      |
| 42569586                                                                                                                                           | AT2G33240            | 2                 | XI(G)                  | MyoN, IQ,CC, DIL                           | XI-D                      |
| 15230968                                                                                                                                           | AT3G58160            | 3                 | XI(J)                  | MyoN, IQ,CC                                | XI-J                      |
| 15231004                                                                                                                                           | AT3G19960            | 3                 | VIII(A)                | MyoN, IQ,CC                                | VIII-1 (ATM1)             |
| 15234096                                                                                                                                           | AT4G27370            | 4                 | VIII(B)                | IQ,CC                                      | VIII-B                    |
| 15235408                                                                                                                                           | AT4G28710            | 4                 | XI(G)                  | MyoN, IQ                                   | XIH                       |
| 42567348                                                                                                                                           | AT4G33200            | 4                 | XI(I)                  | MyoN, IQ,CC, DIL                           | XI-I                      |
| 15240028                                                                                                                                           | AT5G43900            | 5                 | XI(G)                  | MyoN, IQ,CC, DIL                           | XI-2 (MYA2)               |
| 42567989                                                                                                                                           | AT5G20490            | 5                 | XI(K)                  | MyoN, IQ,CC, DIL                           | XI-K                      |
| 42568525                                                                                                                                           | AT5G54280            | 5                 | VIII(B)                | IQ,CC                                      | VIII-2 (ATM2)             |
| <i>Oryza sativa</i> <sup>2</sup>                                                                                                                   |                      |                   |                        |                                            |                           |
| 34910550                                                                                                                                           | B1142C05.32          | 1                 | XI(K)                  | MyoN, IQ,CC, DIL                           |                           |
| 50913341                                                                                                                                           | OJ1534_E09.18        | 2                 | XI(I)                  | MyoN, IQ,CC, DIL                           |                           |
| 50915880                                                                                                                                           | P0643F09.26          | 2                 | XI(G)                  | MyoN, IQ,CC, DIL                           |                           |
| 50909237                                                                                                                                           | OSJNBa0069D13.10     | 2                 | XI(G)                  | MyoN, IQ,CC, DIL                           |                           |
| 50920299                                                                                                                                           | OSJNBa0033P04.23     | 3                 | XI(G)                  | IQ,CC, DIL                                 |                           |
| 50918683                                                                                                                                           | OSJNBa0069E14.11     | 3                 | XI(F)                  | MyoN, IQ,CC, DIL                           |                           |
| 50872470                                                                                                                                           | OSJNBb0024N19.13     | 3                 | XI(K)                  | MyoN, IQ,CC, DIL                           |                           |
| 50932503                                                                                                                                           | OJ1741_B01.17        | 5                 | XI(K)                  | MyoN, IQ,CC                                |                           |
| n/a                                                                                                                                                | n/a                  | 5                 | n/a                    | MyoN, IQ,CC, DIL                           | OsMyoXI-I, incomplete     |
| 51535675                                                                                                                                           | P0583E12.11          | 6                 | XI(J)                  | MyoN, IQ,CC, DIL                           |                           |
| 36956965                                                                                                                                           |                      | 7                 | ?                      | MyoN, IQ,CC                                | Jiang SY and Ramachandram |
| 37535568                                                                                                                                           | OSJNBb0049A16.3      | 10                | VIII(A)                | IQ,CC                                      |                           |
| 37534010                                                                                                                                           | OSJNBa0011L09.10     | 10                | XI(I)                  | MyoN, IQ,CC, DIL                           |                           |
| 37533058                                                                                                                                           | OSJNBa0050M22.5      | 10                | XI(I)                  | MyoN, IQ,CC, DIL                           |                           |
| <i>Populus trichocarpa</i> * ( <a href="http://genome.jgi-psf.org/Poptr1/Poptr1.home.html">http://genome.jgi-psf.org/Poptr1/Poptr1.home.html</a> ) |                      |                   |                        |                                            |                           |
|                                                                                                                                                    | PpXIII000424         |                   | XI(J)                  | IQ,CC, DIL                                 |                           |
|                                                                                                                                                    | PpII001125           |                   | XI(G)                  | IQ,CC, DIL                                 |                           |
|                                                                                                                                                    | PpII000379           |                   | XI(J)                  | MyoN, IQ,CC, DIL                           |                           |
|                                                                                                                                                    | PpVII0671            |                   | VIII(A)                | MyoN, IQ,CC                                |                           |
|                                                                                                                                                    | PpVIII0427           |                   | XI(G)                  | MyoN, IQ,CC, DIL                           |                           |
|                                                                                                                                                    | PpXI0074             |                   | VIII(B)                | MyoN, IQ,CC                                |                           |
|                                                                                                                                                    | PpV000284            |                   | VIII(A)                | IQ,CC                                      |                           |
|                                                                                                                                                    | Pp582092             |                   | VIII(B)                | MyoN, IQ,CC                                |                           |
|                                                                                                                                                    | Pp61258              |                   | XI(J)                  | IQ,CC, DIL                                 |                           |
|                                                                                                                                                    | 561027               |                   | XI(K)                  | MyoN, IQ,CC, DIL                           |                           |

**Table 1. continue**

| GI or protein ID            | Gene/locus ID | Chromosome | Class and Group | Domains in addition to motor domain | Comment                 |
|-----------------------------|---------------|------------|-----------------|-------------------------------------|-------------------------|
| <i>Nicotiana bentamiana</i> |               |            |                 |                                     |                         |
|                             | Nb XI-2       |            | XI(G)           | IQ,CC                               |                         |
|                             | Nb XI-F       |            | XI(F)           | MyoN, IQ,CC, DIL                    |                         |
|                             | Nb XI-K       |            | XI(K)           | MyoN, IQ,CC, DIL                    |                         |
|                             | Nb VIII-B     |            | VIII(B)         | MyoN, IQ,CC                         |                         |
|                             | Nb VIII-2     |            | VIII(B)         | MyoN, IQ,CC                         |                         |
|                             | Nb VIII-1     |            | VIII(A)         | MyoN, IQ,CC                         |                         |
| <i>Nicotiana tabacum</i>    |               |            |                 |                                     |                         |
| 56201391                    |               |            | XI(K)           | MyoN, IQ,CC, DIL                    |                         |
| 29170491                    |               |            | XI(G)           | IQ,CC                               |                         |
| <i>Zea mays</i>             |               |            |                 |                                     |                         |
| 4733891                     |               |            | XI(K)           | MyoN, IQ,CC, DIL                    |                         |
| 4885026                     |               |            | VIII(A)         | MyoN, IQ,CC                         |                         |
| 4960051                     |               |            | XI(G)           | IQ,CC, DIL                          |                         |
| <i>Medicago truncatula</i>  |               |            |                 |                                     |                         |
| 92871115                    |               |            | XI(I)           | IQ,CC                               |                         |
| 92874377                    |               |            | XI(G)           | MyoN, IQ,CC, DIL                    |                         |
| 92876979                    |               |            | VIII(B)         | MyoN, IQ,CC                         |                         |
| <i>Helianthus annuus</i>    |               |            |                 |                                     |                         |
| 2444174                     |               |            | VIII(A)         | MyoN, IQ,CC                         |                         |
| 2444176                     |               |            | XI(K)           | MyoN, IQ,CC                         | Very similar to 2444180 |
| 2444178                     |               |            | XI(G)           | MyoN, IQ,CC, DIL                    |                         |
| 2444180                     |               |            | XI(K)           | MyoN, IQ,CC, DIL                    |                         |
| 2731702                     |               |            | VIII(B)         | MyoN, IQ                            |                         |
| <i>Petroselinum crispum</i> |               |            |                 |                                     |                         |
| 12231997                    |               |            | VIII(B)         | MyoN, IQ,CC                         |                         |
| <i>Vallisneria spiralis</i> |               |            |                 |                                     |                         |
| 7243765                     |               |            | XI(G)           | MyoN, IQ,CC, DIL                    |                         |

**Note:** \* - only myosins containing a head domain (myosin motor domain) were considered; <sup>1</sup> - myosins from *Arabidopsis thaliana* are listed according to Reddy AS and Day IS, 2001. The names assigned to *Arabidopsis* myosins are listed in the “Comment” field; <sup>2</sup> - myosins from *Oryza sativa* are listed according to ShuYe Jiang and Srinivasan Ramachandran, 2004; Domain abbreviations: MyoN – SH3-like myosin N-terminal domain; IQ - IQ calmodulin-binding motif; CC – coiled-coil domain; DIL – dilute-like domain;
