# Supplementary material
Source: PubMed Central journal article supplement (PMC2259067)
Supplement: plntphys_pp.107.113647_7.pdf [file plntphys_pp.107.113647_7.pdf]

Table S2: Organelle movement data

| Organelle    | Treatment    | Mean Velocity <sup>1</sup> ±SD (µm/sec) | Mean Displacement Rate <sup>2</sup> ±SD (µm/sec) | Mean Distance <sup>3</sup> ±SD (µm) |
|--------------|--------------|-----------------------------------------|--------------------------------------------------|-------------------------------------|
| Golgi        | EV           | 1.107±0.982                             | 0.544±0.819                                      | 28.93±25.49                         |
|              | XI-2         | 0.758±0.809                             | 0.373±0.614                                      | 20.58±18.35                         |
|              | XI-F         | 0.881±0.855                             | 0.397±0.716                                      | 23.91±20.98                         |
|              | XI-K         | 0.123±0.088                             | 0.062±0.080                                      | 00.61±00.49                         |
|              | XI-K/GTD     | 0.123±0.045                             | 0.046±0.039                                      | 00.58±00.45                         |
|              | VIII-1       | 0.887±0.822                             | 0.446±0.714                                      | 22.83±22.27                         |
|              | ds GFP       | 1.251±1.088                             | 0.587±0.894                                      | 32.25±30.06                         |
|              | ds XI-2      | 0.747±0.762                             | 0.333±0.605                                      | 25.19±20.57                         |
|              | ds XI-F      | 0.893±0.826                             | 0.893±0.825                                      | 34.17±23.86                         |
|              | ds XI-K      | 0.222±0.157                             | 0.126±0.133                                      | 01.54±01.59                         |
| Mitochondria | EV           | 1.394±1.009                             | 0.740±0.962                                      | 25.66±21.99                         |
|              | XI-2         | 1.120±0.809                             | 0.462±0.562                                      | 29.36±25.38                         |
|              | XI-F         | 1.121±0.489                             | 0.394±0.326                                      | 35.26±24.28                         |
|              | XI-K         | 0.168±0.100                             | 0.068±0.082                                      | 00.95±00.80                         |
|              | VIII-1       | 1.327±1.278                             | 0.594±0.979                                      | 35.34±27.77                         |
|              | EV/silencing | 1.391±0.979                             | 0.709±0.918                                      | 26.69±23.70                         |
|              | ds XI-2      | 0.779±0.459                             | 0.330±0.378                                      | 37.70±28.52                         |
|              | ds XI-F      | 0.985±0.880                             | 0.557±0.819                                      | 24.89±24.93                         |
|              | ds XI-K      | 0.088±0.044                             | 0.048±0.041                                      | 00.99±00.86                         |
|              | Peroxisomes  | EV                                      | 0.881±1.133                                      | 0.585±0.987                         |
| XI-2         |              | 0.284±0.387                             | 0.178±0.304                                      | 08.62±10.76                         |
| XI-F         |              | 0.357±0.565                             | 0.214±0.492                                      | 10.56±12.00                         |
| XI-K         |              | 0.063±0.043                             | 0.030±0.034                                      | 01.20±00.90                         |
| VIII-1       |              | 0.480±0.546                             | 0.330±0.436                                      | 10.72±11.51                         |
| ds GFP       |              | 0.940±1.040                             | 0.616±0.950                                      | 14.73±16.30                         |
| ds XI-2      |              | 0.592±0.738                             | 0.381±0.603                                      | 11.01±12.58                         |
| ds XI-F      |              | 0.552±0.515                             | 0.291±0.366                                      | 12.88±13.16                         |
| ds XI-K      |              | 0.195±0.162                             | 0.125±0.158                                      | 02.07±02.57                         |

<sup>1</sup>Speed calculated using the full length of the organelle track; <sup>2</sup>Speed calculated using the straight line length between the first and the last points of the track; <sup>3</sup>Full track length.
