# Supplementary material
Source: PubMed Central journal article supplement (PMC2259067)
Supplement: plntphys_pp.107.113647_8.pdf [file plntphys_pp.107.113647_8.pdf]

Table S3: Statistical analysis of the organelle velocity ( $\mu\text{m}/\text{sec}$ )

| Organelle    | Treatment   | N <sup>1</sup> | Scheffe group | Mean       | S.D.       | Median     |
|--------------|-------------|----------------|---------------|------------|------------|------------|
| Golgi        | EV          | 407            | A             | 1.10745079 | 0.98239915 | 0.832033   |
|              | VIII-1      | 433            | B             | 0.88687586 | 0.82170794 | 0.729308   |
|              | XI-F        | 477            | B             | 0.88137149 | 0.85450231 | 0.655759   |
|              | XI-2        | 521            | C             | 0.75788657 | 0.80855668 | 0.525522   |
|              | XI-K        | 426            | D             | 0.12289702 | 0.08816986 | 0.096349   |
|              | XI-K/GTD    | 160            | D             | 0.12270448 | 0.04482545 | 0.122771   |
|              | ds GFP      | 433            | A             | 1.25108365 | 1.08785701 | 1.024490   |
|              | ds XI-F     | 447            | B             | 0.89318264 | 0.82574608 | 0.684305   |
|              | ds XI-2     | 432            | C             | 0.74745416 | 0.76158926 | 0.537068   |
|              | ds XI-K     | 455            | D             | 0.22154252 | 0.15714155 | 0.170613   |
| Mitochondria | EV          | 420            | A             | 1.39404700 | 1.00946672 | 1.194595   |
|              | XI-2        | 497            | B             | 1.19976749 | 0.80925845 | 1.058070   |
|              | XI-F        | 423            | B             | 1.12067894 | 0.48860786 | 1.149690   |
|              | VIII-1      | 413            | B             | 1.32658512 | 1.27790238 | 1.026560   |
|              | XI-K        | 466            | C             | 0.16771135 | 0.10000982 | 0.152780   |
|              | EV          | 471            | A             | 1.39115124 | 0.97862807 | 1.229780   |
|              | ds XI-F     | 432            | B             | 0.98513317 | 0.88020967 | 0.800495   |
|              | ds XI-2     | 444            | B             | 0.77900670 | 0.45874877 | 0.740596   |
|              | ds XI-K     | 421            | C             | 0.08775638 | 0.04359263 | 0.083750   |
|              | Peroxisomes | EV             | 423           | A          | 0.88137577 | 1.13296050 |
| VIII-1       |             | 420            | B             | 0.47964723 | 0.54628997 | 0.346998   |
| XI-2         |             | 430            | C             | 0.28441717 | 0.38274331 | 0.120888   |
| XI-F         |             | 412            | C             | 0.35746544 | 0.56543034 | 0.144518   |
| XI-K         |             | 455            | D             | 0.06252615 | 0.04297281 | 0.050586   |
| ds GFP       |             | 429            | A             | 0.93979875 | 1.04039216 | 0.535443   |
| ds XI-F      |             | 435            | B             | 0.55206598 | 0.51482332 | 0.383163   |
| ds XI-2      |             | 423            | B             | 0.59234001 | 0.73792630 | 0.327721   |
| ds XI-K      |             | 433            | C             | 0.19497290 | 0.16209252 | 0.149575   |

<sup>1</sup>Number of analyzed organelles.
